# Supplementary material for: Recognition and cleavage mechanism of intron-containing pre-tRNA by human TSEN endonuclease complex
Source: PubMed Central journal article supplement (PMC10539383; doi:10.1038/s41467-023-41845-y), 2023-09-28
Supplement: 41467_2023_41845_MOESM3_ESM.pdf [file 41467_2023_41845_MOESM3_ESM.pdf]

### **Description of Additional Supplementary Files**

File Name: Supplementary Data 1

Description: to list the sequences of oligonucleotides (e.g. primers and RNAs)
